# Supplementary material for: The Relationship between a Rotational Molding Processing Procedure and the Structure and Properties of Biobased Polyethylene Composites Filled with Expanded Vermiculite
Source: MDPI journal article supplement (doi:10.3390/ma15175903), 2022-08-26
Supplement: s1 [file s1]

## Article

# The Relationship between a Rotational Molding Processing Procedure and the Structure and Properties of Biobased Polyethylene composites Filled with Expanded Vermiculite

Joanna Aniśko <sup>1,\*</sup>, Mateusz Barczewski <sup>1</sup>, Adam Piasecki <sup>2</sup>, Katarzyna Skórczewska <sup>3</sup>, Joanna Szulc <sup>3</sup> and Marek Szostak <sup>1</sup>

<sup>1</sup> Institute of Materials Technology, Faculty of Mechanical Engineering, Poznan University of Technology, Piotrowo 3, 61-139 Poznan, Poland

<sup>2</sup> Institute of Materials Engineering, Faculty of Materials Engineering and Technical Physics, Poznan University of Technology, Piotrowo 3, 61-138 Poznan, Poland

<sup>3</sup> Faculty of Chemical Technology and Engineering, Bydgoszcz University of Technology, Seminaryjna 3, Bydgoszcz, Poland

\* Correspondence: joanna.anisko@put.poznan.pl

## 1. Supplementary data

**Table S1.** Thermal properties from DSC of samples obtained in rotational molding technology.

|             |       | T <sub>M</sub> | T <sub>C</sub> | ΔH <sub>M</sub> | X <sub>C</sub> <sup>(1)</sup> |
|-------------|-------|----------------|----------------|-----------------|-------------------------------|
|             |       | [°C]           |                | [J/g]           | [%]                           |
| Dry blended | HDPE  | 132,2          | 117,2          | 195,6           | 66,76                         |
|             | 0,5EV | 133,2          | 116,2          | 188             | 64,49                         |
|             | 1EV   | 133,4          | 116            | 178,1           | 61,40                         |
|             | 2EV   | 134,6          | 116,4          | 184,9           | 64,39                         |
|             | 5EV   | 133,7          | 114,7          | 178,5           | 64,13                         |
|             | 10EV  | 134,1          | 114            | 180,4           | 68,41                         |
| Compounded  | HDPE  | 133,3          | 117,2          | 189,9           | 64,81                         |
|             | 0,5EV | 132,9          | 117,9          | 196             | 67,23                         |
|             | 1EV   | 133,6          | 117,7          | 184,7           | 63,67                         |
|             | 2EV   | 133,7          | 118            | 191             | 66,52                         |
|             | 5EV   | 133            | 118,3          | 185             | 66,46                         |
|             | 10EV  | 132,8          | 118,6          | 177,3           | 67,24                         |

$$X_C = \frac{\Delta H_M}{(1-\varphi) \cdot \Delta H_{100\%}} \cdot 100\% \quad (1)$$

ΔH<sub>M</sub> – melting enthalpy [J/g]

ΔH<sub>100%</sub> – melting enthalpy of 100% crystalline PE (293 J/g)

φ – content of the filler [-]

**Table S2.** Thermogravimetric properties.

|             |       | W <sub>5</sub> | W <sub>10</sub> | W <sub>50</sub> | DTG   |       | ΔW    |
|-------------|-------|----------------|-----------------|-----------------|-------|-------|-------|
|             |       |                | [°C]            |                 | [°C]  | %/min | [%]   |
| Dry blended | HDPE  | 433            | 444,7           | 468,9           | 470,9 | 38,1  | -1,37 |
|             | 0,5EV | 433,7          | 445,8           | 469,3           | 474,5 | 35,03 | -0,04 |
|             | 1EV   | 433,1          | 445             | 469,1           | 473,6 | 35,2  | 0,41  |
|             | 2EV   | 434,5          | 446,5           | 469,3           | 472,9 | 37,08 | 2,71  |
|             | 5EV   | 435,3          | 446,7           | 470,2           | 474,4 | 32,75 | 4,83  |
|             | 10EV  | 433,4          | 445,5           | 469,8           | 472,6 | 30,85 | 5,12  |
| Compounded  | HDPE  | 437,5          | 449             | 471,9           | 476,1 | 37,63 | -0,6  |
|             | 0,5EV | 436,3          | 447,8           | 471,4           | 476,8 | 35,52 | 0,44  |
|             | 1EV   | 435            | 447,2           | 471,3           | 476,6 | 35,02 | 0,36  |
|             | 2EV   | 436,4          | 448,8           | 473             | 478,2 | 34,94 | 1,5   |
|             | 5EV   | 435,3          | 448,1           | 472,1           | 472,4 | 33,4  | 4,47  |
|             | 10EV  | 435,2          | 447,3           | 472,4           | 475   | 32,18 | 8,99  |

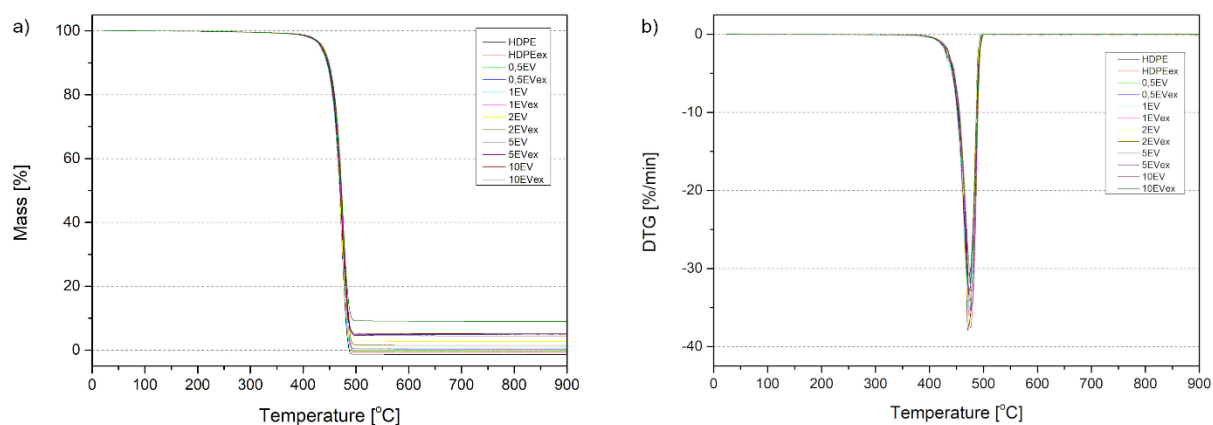**Figure S1.** TG (a) and DTG (b) curves obtained from thermogravimetric measurement.

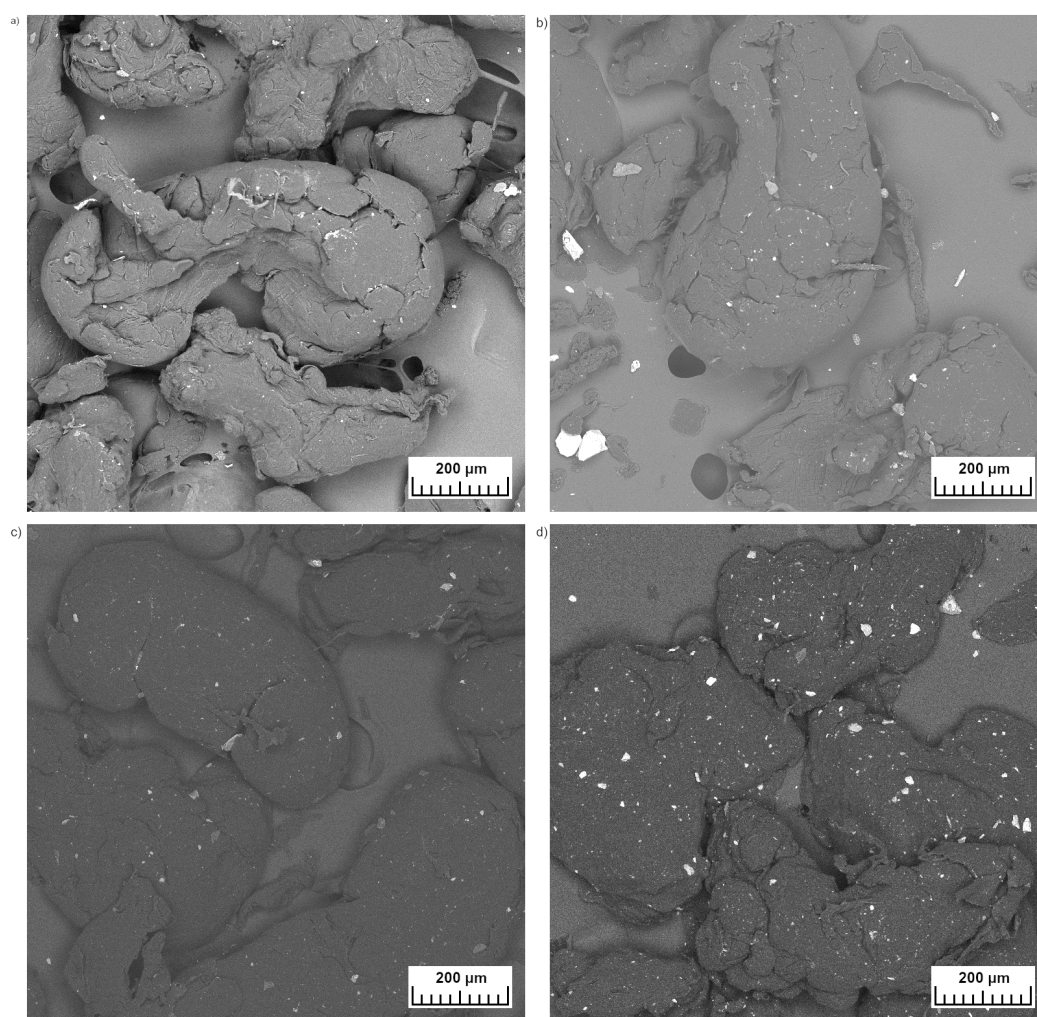

**Figure S2.** EDS SEM images of composite powder particles containing 0.5 wt% (a), 1 wt%, 2 wt% and 5 wt% of EV.

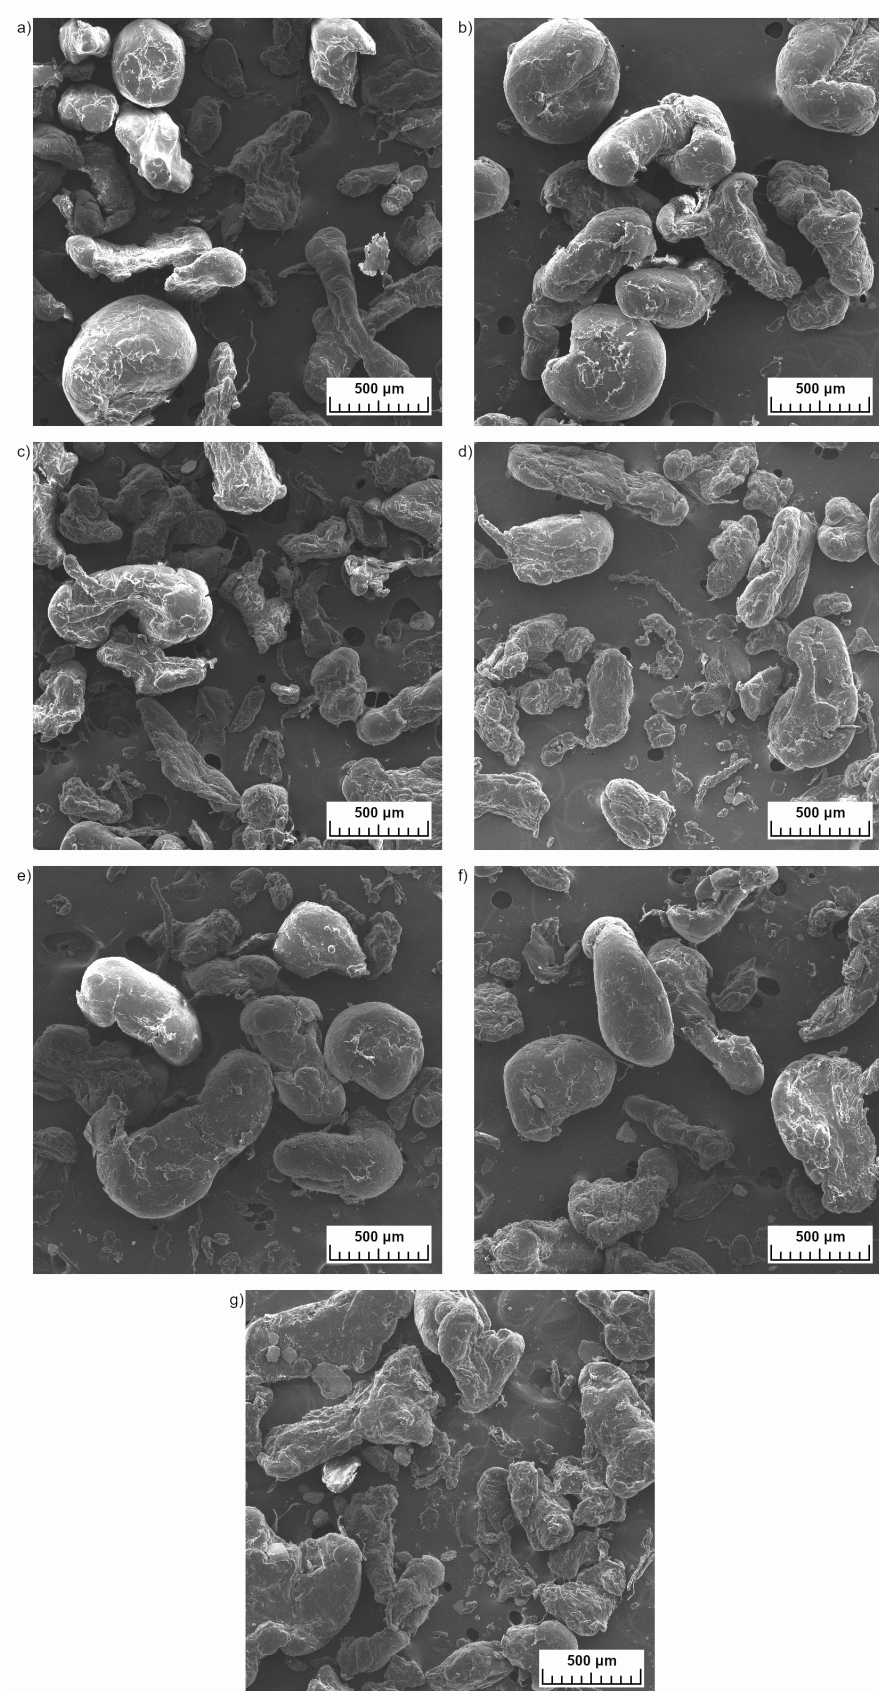

**Figure S3.** SEM images of HDPE (a) and HDPE<sub>ex</sub> (b) and composite particles containing 0.5 wt% (c), 1 wt% (d), 2 wt% (e), 5 wt% (f), 10 wt% (g).
